1 **Title page**

2 **Title**

3 Population genetics of recent colonization suggests the importance of recurrent immigration on  
4 remote islands

5 **A short running title**

6 Population genetics of island colonization

7 **Authors**

8 Daisuke AOKI<sup>1,2</sup>, Shin MATSUI<sup>3</sup>, Mari ESASHI<sup>1</sup>, Isao NISHIUMI<sup>4</sup>, Junco NAGATA<sup>2</sup>, & Masaaki  
9 TAKAGI<sup>1,\*</sup>

10 **Affiliations**

11 <sup>1</sup>Department of Natural History Science, Graduate School of Science, Hokkaido University, Sapporo,  
12 Hokkaido, Japan 060-0810

13 <sup>2</sup>Department of Wildlife Biology, Forestry and Forest Products Research Institute, Tsukuba, Ibaraki,  
14 Japan 305-8687

15 <sup>3</sup>Department of Biology, School of Biological Sciences, Tokai University, Sapporo, Hokkaido, Japan  
16 005-8601

17 <sup>4</sup>Department of Zoology, National Museum of Nature and Science, Tokyo, Japan 110-8718

18

19 \*Corresponding author: [mtakagi@eis.hokudai.ac.jp](mailto:mtakagi@eis.hokudai.ac.jp)

20 ORCID: Daisuke Aoki: 0000-0002-5780-8487

21 Shin Matsui: 0000-0003-0796-8439

22 Mari Esashi: 0000-0001-5993-1086

23 Junco Nagata: 0000-0001-9182-319X

24 Masaaki Takagi: 0000-0001-8308-899X

25 **Acknowledgements**

26 Tissues and blood samples were kindly provided by Yamashina Institute for Ornithology and National

27 Museum of Nature and Science. We thank the many members of our field teams (Masako Ueda,  
28 Sadao Imanishi, Isato Chiba, Yasui Takaya, Yuko Tsuchiya, Mariko Senda, Akari Aakamatsu, Hiroaki  
29 Matsumiya, and Seiichi Hara) and Institute for Boninology for their helps with data collection. S.  
30 Hara also kindly provided us his valuable data and information on migration of bull-headed shrikes  
31 for our supplementary material. Ayumi Matsuo and Yoshihisa Suyama gave us many useful tips for  
32 the PCR settings and genotyping protocols. We are thankful for experimental assistance from Mariko  
33 Senda. Akira Sawada, Yusuke Nishida, and Yusaku Okubo provided many useful comments on  
34 statistical analyses. The manuscript was greatly improved by an encouragement message and valuable  
35 comments by Ituro Koizumi. DNA samples were collected with permission from the Ministry of the  
36 Environment Government of Japan. This study was partly conducted with the support of a grant-in-  
37 aid for Scientific Research (C) to MT (no. 97J08530) and to DA (no. 19J21406) from the Japanese  
38 Society for the Promotion of Science (JSPS) and the Support Program of FFPRI for Researchers  
39 Having Family Obligations.

## 40 **Abstract**

### 41 *Aim*

42 Founder effects and recurrent immigration are two major factors that potentially contribute to genetic  
43 differentiation and population persistence in the early-stage of remote island colonization. However,  
44 their relative importance remains controversial. By conducting population genetics analyses of  
45 multiple remote island populations of the bull-headed shrike established naturally within several  
46 decades, we examined the relative contributions of founder effects and recurrent immigration on these  
47 island populations.

### 48 *Location*

49 Japan

### 50 *Taxon*

51 *Lanius bucephalus*

### 52 *Methods*

53 We used 15 microsatellite loci to analyze the population genetics of four newly established island  
54 populations and five Japanese mainland populations. Allelic richness, heterozygosity, genetic  
55 differentiation, and the strength of the genetic bottleneck were compared among the islands. Two  
56 analyses, STRUCTURE and the DAPC, were conducted to assess the relative influence of founder

57 effects and recurrent immigration on genetic differentiation. Temporal samples collected over eight  
58 years on Minami-Daito Island were used to detect any change in genetic structure due to recurrent  
59 immigration.

## 60 *Results*

61 The founder effect strongly influenced genetic differentiation on the most remote oceanic island,  
62 Chichi-jima Island. However, this population became extinct 20 years after colonization, possibly  
63 owing to a lack of recurrent immigration. The founder effect moderately influenced a land-bridge  
64 island, Kikai-jima Island, indicating the presence of a relatively large founder population without  
65 recurrent immigration. Surprisingly, another distant oceanic island, Minami-Daito Island, was likely  
66 subject to multiple recurrent immigration events from the mainland, which obscured any genetic  
67 differentiation previously established by the founder effect.

## 68 *Main conclusion*

69 Underlying the island-specific population dynamics of colonization, founder effects contributed to the  
70 genetic differentiation among the three studied island populations. Importantly, however, recurrent  
71 immigration strongly affected the population persistence and subsequent evolutionary processes of  
72 remote island populations, potentially overwhelming the founder effect. We argue the importance of  
73 recurrent immigration in highly remote island colonization, which has been previously overlooked.

74 **Key words:** Bull-headed Shrike, founder effect, long-distance dispersal, island biogeography,  
75 population genetics, recurrent immigration, seasonal migration

76

## 77 **Main Text**

### 78 **Introduction**

79 A major goal of island biogeography is to understand the processes underlying the emergence of biota  
80 on remote islands over time (Patiño et al., 2017; Warren et al., 2015). Because unique insular  
81 biodiversity consists of many island endemics that evolved on islands after colonization,  
82 understanding the processes by which the organisms arrive on an island and genetic divergence  
83 proceeds is fundamental to determining their origin (Whittaker & Fernández-Palacios, 2007). Long-  
84 distance dispersal is regarded as the major mechanism underlying the arrival of organisms on remote  
85 islands (Whittaker & Fernández-Palacios, 2007). However, the demography and population genetics  
86 associated with such arrivals have not been clarified, although three different scenarios have been  
87 proposed. The classic proposal, i.e., the founder effect scenario, suggests that a population genetic  
88 bottleneck is associated with a strong founder effect at the time of colonization, leading to rapid  
89 genetic divergence (Barton & Charlesworth, 1984). This scenario has not been supported empirically  
90 in a natural system because a severe founder effect has not been inferred in previous population  
91 genetics analyses of island colonization events. However, the two alternative scenarios explain the  
92 lack of empirical support for the classic scenario. In the second scenario, i.e., the large founder  
93 scenario, a relatively large founder population at a single colonization event results in a weak founder  
94 effect, leading to the establishment of an island population without marked genetic differentiation  
95 (Clegg et al., 2002; Pruett & Winker, 2005; Estoup & Clegg, 2003; Vincek et al., 1997). In the third  
96 scenario, i.e., the recurrent immigration scenario, recurrent immigration at the early-stage of  
97 population establishment obscures the initial founder effect, resulting in the establishment of an island  
98 population with low genetic differentiation (Grant, Grant, & Petren, 2001). These three scenarios are  
99 discriminated by (1) whether a founder effect is sufficiently influential that it results in genetic  
100 differentiation by introducing rare allele combinations and (2) whether recurrent immigration is  
101 sufficiently important that it alters the genetic pattern produced by the initial founder effect. Because  
102 founder effects and recurrent immigration have been long considered fundamental demographic  
103 processes that potentially affect the way in which founder organisms evolve (Mayr, 1954), it is  
104 important to determine which scenarios best explain colonization events.

105         Discriminating among various scenarios is important in island biogeography because different  
106 evolutionary processes (e.g., natural selection and genetic divergence) may follow different scenarios.  
107 For example, with a single strong founder effect, the rise of novel allelic combinations could be  
108 important for the progression of natural selection and subsequent divergence (Mayr, 1954; Barton &  
109 Charlesworth, 1984). In a large founder population, genetic drift subsequent to island colonization  
110 provides an important genetic background for adaptive evolution (Clegg et al., 2002; Sendell-Price et  
111 al., 2021). Under the strong influence of recurrent immigration, evolutionary processes that interact

112 with gene flow, such as divergence-with-gene-flow (Feder, Flaxman, Egan, Comeault, & Nosil, 2013;  
113 Smadja & Butlin, 2011), can become important.

114 Distinguishing the three aforementioned scenarios has been challenging owing to the lack of a  
115 suitable system wherein a population reflecting the initial population genetic structure can be studied.  
116 Many previous studies applied genetic methods to old island colonization events, i.e., older than  
117 several hundreds of years; thus, technical difficulties in accurately estimating the timing of gene flow  
118 and genetic bottlenecks (Smadja & Butlin, 2011) have led to difficulties distinguishing the different  
119 demographic scenarios. Recurrent immigration within a short period after colonization obscures the  
120 initial founder effect (Grant et al., 2001) as the genetic consequence resembles a large founder  
121 population at a single time point (Grant, 2002). A pattern generated by a founder effect also resembles  
122 prolonged genetic drift after population establishment by a large founder population (Clegg et al.,  
123 2002). Therefore, the direct assessment of population genetic structure following recent island  
124 colonization is crucial. However, given the rarity of such colonization events, these assessments have  
125 not been achieved previously in the wild, except for a single colonization event (Grant et al., 2001)  
126 and excluding possible cases of human-assisted colonization, such as that of monarch butterflies  
127 colonized the Pacific islands (Hemstrom, Freedman, Zalucki, Ramírez, & Miller, 2022). A single case  
128 of island colonization cannot be generalized; therefore, genetic studies on multiple cases are required.

129 In the present study, we used a valuable study system in which the bull-headed shrike (*Lanius*  
130 *bucephalus*), a medium-sized passerine, has naturally colonized five remote Japanese islands and  
131 established resident populations over 50 years (Figure 1a; Table 1). These five islands are located  
132 200–500 km beyond the normal breeding range of the species, reflecting disjunct distributions well  
133 beyond the normal dispersal range of many other medium-sized passerine species (Paradis et al.,  
134 1998), suggesting that colonization was accomplished via rare long-distance dispersal events. Two  
135 islands, namely Nakano-shima Island and Kikai-jima Island, (KKJ) are land-bridge islands in the  
136 Ryukyu Archipelago (Japan's southwestern most islands) where shrikes are rare seasonal migrants  
137 (Amami Ornithologists' Club, 1997; Okinawa Wild Bird Study Group, 1986). In contrast, Minami-  
138 Daito Island (MDT), Kita-Daito Island (KDT), and Chichi-jima Island (CCJ) are oceanic islands on  
139 the Pacific Sea, where rare vagrant birds can arrive during spring and autumn (Takehara, Anezaki,  
140 Takagi, Okudo & Knagawa, 1999; Ando, Emura & Deguchi, 2020). Therefore, population genetics  
141 analyses of these multiple remote islands will potentially reveal variation in colonization scenarios  
142 with early-stage population genetic structures. Scenario comparisons of multiple islands will likely  
143 lead to both generalizable and island-specific results, allowing us to evaluate the influence of founder  
144 effects and recurrent immigration. The uniqueness of our study system is further improved by  
145 different colonization consequences on two of the oceanic islands: the CCJ population became extinct  
146 20 years after population establishment, whereas the MDT population has persisted for roughly 50  
147 years. Therefore, we are able to infer a relationship between the influence of the founder effect and

148 recurrent immigration and the fate of the established populations.

149 We performed population genetics analyses of bull-headed shrikes on the main islands of the  
150 Japanese Archipelago (hereafter, “the mainland”) and four remote islands using 15 microsatellites.  
151 Genetic diversity and the level of genetic differentiation were estimated using common statistical  
152 measures, e.g., heterozygosity, allelic richness, and  $F_{st}$ , as well as bottleneck tests, and genetic  
153 differentiation was also evaluated using Bayesian clustering analysis and multivariate analysis. We  
154 did not apply immigrant detection methods, e.g., BayesAss (Wilson & Rannala, 2003), or gene flow  
155 estimates via isolation-with-migration models, e.g., IMA (Hey, 2010), because the islands were  
156 colonized within a few to several decades, suggesting that the island populations would not satisfy the  
157 requirements of these methods, i.e., sufficient genetic differentiation (Wilson & Rannala, 2003) and/or  
158 divergence (Hey, 2010) from the populations under comparison. Nevertheless, the use of standard  
159 genetic methods to analyze the newly founded populations allowed us to make predictions under the  
160 three aforementioned scenarios. The founder effect scenario (scenario 1: Figure 1b-1) assumes a  
161 strong founder effect and no recurrent immigration; thus, an insular population representing a rare  
162 allele combination of mainland individuals is expected (Slatkin, 2004). Hence, we predicted a strong  
163 genetic bottleneck, high genetic differentiation, and low allelic richness and heterozygosity under  
164 scenario 1. The large founder scenario (scenario 2: Figure 1b-2) assumes a weak founder effect and no  
165 recurrent immigration; thus, under this scenario, we predicted no apparent genetic differentiation and  
166 no representation of the mainland allele combination, a moderate genetic bottleneck, and moderately  
167 low allelic richness because “a large founder” would not be as large as the mainland population and  
168 allelic diversity is sensitive to changes in population size (Nei, Maruyama, & Chakraborty, 1975).  
169 Reduction in expected heterozygosity is also predicted under the large founder scenario because  
170 expected heterozygosity can be restored slowly without recurrent immigration (Keller et al., 2001;  
171 Nei et al., 1975). The recurrent immigration scenario (scenario 3: Figure 1b-3) assumes that recurrent  
172 immigration obscures the founder effect; therefore, we predicted both high allelic richness and  
173 heterozygosity as well as a low level of differentiation (Grant et al., 2001; Keller et al., 2001).  
174 Temporal samples collected across eight years from MDT were available, allowing us to identify the  
175 recurrent immigration scenario, i.e., the level of genetic differentiation of the island population  
176 relative to that of the mainland should decrease after a recurrent immigration event. Based on our  
177 findings, we discuss the contribution of the founder effect and recurrent immigration to the genetic  
178 differentiation and population persistence of remote island populations following colonization.

## 179 **Methods**

### 180 *Study system and field procedure*

181 The first observations of breeding attempts by bull-headed shrikes on various remote Japanese islands

182 are as follows: (1) on MDT and KDT, in the Daito Islands, in 1973–1974 (Takagi, 2000); (2) on CCJ,  
183 in the Ogasawara Islands, in 1984–1988 (Chiba, 1990); (3) on Nakano-shima, in the Tokara Islands, in  
184 1989 (Morioka, 1990); and (4) on KKJ, in the Amami Islands, in 2012 (Ijichi, Torikai, & Hamao,  
185 2013) (Figure 1; Table 1). On the Japanese mainland, shrikes are partial migrants and both migratory  
186 and resident shrikes co-occur; in contrast, in the northern part (e.g., Hokkaido) or high mountain  
187 ranges (e.g., the Japanese Alps) of Japan, a high proportion of seasonal migrants occur (Imanishi,  
188 2005; Ministry of the Environment of Japan, 2020).

189 Blood samples were collected from shrikes from several populations on mainland Japan and  
190 from four of the five remote islands (MDT, KDT, CCJ, and KKJ) (Figure 1; Table 1). Samples were  
191 stored in 99.5% ethanol. Field sampling was conducted locally in a time-intensive manner for the  
192 insular populations and many of the mainland populations during the breeding period ( $n = 54$  on  
193 Osaka in 1989;  $n = 32$  on Hokkaido in 1998;  $n = 15$  on CCJ in 1997;  $n = 4$  on KDT in 2008;  $n = 5$  on  
194 KKJ in 2013 and 2015;  $n = 25$  on Nagano in 2019; see below for MDT). For CCJ, additional samples  
195 were collected in 1995 ( $n = 1$ ) and 1998 ( $n = 2$ ), and these were also included in two analyses:  
196 STRUCTURE and the discriminant analysis of principal components (DAPC). Mist nets and spring  
197 net traps were used to capture shrikes for blood sampling. Tissue and blood samples from the Kyushu  
198 ( $n = 14$ ) and Kanto ( $n = 18$ ) regions were collected opportunistically, resulting in wider regional  
199 sampling over multiple years. Samples in these two regions were collected both in the breeding  
200 seasons and prebreeding seasons when shrikes occupy breeding territories for the coming spring  
201 (Kurata, 1967). Although opportunistic sampling can affect genetic results, the effect of different  
202 sampling schemes on our results was limited. On MDT, samples from multiple breeding seasons, i.e.,  
203 in 1998 ( $n = 30$ ) and annually from 2002 to 2008 ( $n = 365$  in total), were collected. We used the  
204 samples collected in 1998 as representative of the earlier genetic structure of the MDT population for  
205 most of the genetic analyses, whereas data collected in 2002–2008 were combined with those from  
206 1998 to analyze the temporal genetic change. See Table S1 for sample details.

### 207 *Laboratory procedure and calculation of genetic diversity indices*

208 DNA was extracted from samples using either a Qiagen Blood & Tissue Kit (Qiagen) or Dr.GenTLE  
209 (TaKaRa) following the manufacturers' protocols. The genotype of each of the samples was  
210 determined at 15 microsatellite loci. We followed the method of Matsuo et al. (2014) in our  
211 experimental protocols. The primers used in the present study are summarized in Table S2. Because  
212 each population could include a different proportion of closely related individuals, the results of the  
213 following genetic analyses may be biased (Devlin & Roeder, 1999). Therefore, we modified a dataset  
214 in which the relatedness of individuals was controlled for each population by retaining only one  
215 individual for each full-sib cluster inferred using COLONY v.2.0.6.6 (Jones & Wang, 2010). We used  
216 the dataset without relatedness in the following analyses. See the supplementary methods for full

217 details.

218 Null allele frequencies were estimated for each locus for each population using FreeNA  
219 (Chapuis & Estoup, 2007). Tests for linkage disequilibrium across all the populations were conducted  
220 using GENEPOP v. 4.7.5 (Raymond & Rousset, 1995; Rousset, 2008). We compared allelic richness,  
221 expected heterozygosity, and observed heterozygosity among populations by constructing linear  
222 mixed regression models using the ‘lmerTest’ package in R (Kuznetsova, Brockhoff, & Christensen,  
223 2017). We separately constructed a model for each set containing one island (CCJ, KKJ, or MDT) and  
224 five mainland regions to estimate the degree of reduction in the genetic diversity indices (KDT was  
225 excluded because it was considered a sink population of the MDT population based on the DAPC). In  
226 each model, we assigned the five mainland regions as “mainland” and one island as “island” and set  
227 these as the explanatory variables, whereas the locus identity was set as a random factor. We estimated  
228 a model coefficient of the effect of the category “island” and its statistical significance in each model.  
229 Allelic richness was calculated according to the rarefaction method using HP rare (Kalinowski, 2004,  
230 2005), which performs rarefaction for unbiased estimates of allelic richness. Given that the smallest  
231 sample size was four (KDT), it was rarefied to eight genes per locus. We calculated expected and  
232 observed heterozygosity for each locus for each population under two different models: model one  
233 accounted for the presence of null alleles and genotyping failures, whereas model two also accounted  
234 for the inbreeding coefficient of the first model determined using INEST v. 2.2 (Chybicki & Burczyk,  
235 2009). The model with the lowest deviance information criterion (DIC) value may outperform the  
236 other. Chains with 1,000,000 cycles and a burn-in of 100,000 cycles were run, and parameters were  
237 retained every 100th update. As the inbreeding coefficient was not significant in any population (see  
238 Results), heterozygosity calculated under the first model was compared among populations.

239 A test for heterozygosity excess under the two-phase model (Cornuet & Luikart, 1996) and  
240 the *M*-ratio test (Garza & Williamson, 2001) were conducted as genetic bottleneck tests for each  
241 population in INEST v. 2.2. An *M*-ratio of <0.68 was determined as the signature of a bottleneck  
242 effect (Garza & Williamson, 2001). Pairwise *F*<sub>st</sub> values between pairs of populations were calculated  
243 with 95% confidence intervals, and the presence of null alleles was accounted for using FreeNA  
244 (Chapuis & Estoup, 2007). Differences in mean *F*<sub>st</sub> values were compared between each set of inter-  
245 mainland–island comparisons for each island (e.g., between the *F*<sub>st</sub> of Kanto–MDT and that of  
246 Hokkaido–MDT). Significance levels were calculated using two-sided permutation tests with 10,000  
247 resampling iterations.

#### 248 *Spatial genetic structure*

249 STRUCTURE analysis (Falush et al., 2003; Pritchard et al., 2000) was conducted based on the  
250 “Admixture model” assuming correlated allele frequencies among populations with 10 replicates of



251 100,000 cycles of burn-in and 500,000 cycles of the Markov chain Monte Carlo. The number of  
252 genetic clusters,  $K$ , was tested from 1 to 10. The Evanno method was used to infer the best value of  $K$   
253 according to  $\Delta K$  values from the results (Evanno, Regnaut, & Goudet, 2005). Ten replicates were  
254 combined into one output using CLUMPP (Jakobsson & Rosenberg, 2007), and the results are shown  
255 across several  $K$  values including the best  $K$ . The DAPC (Jombart et al., 2010) was implemented via  
256 the R package ‘adegenet’ v. 1.2.1 (Jombart, 2008) to assess genetic structure within a complex  
257 population structure, which was suspected in the studied populations based on STRUCTURE analysis.  
258 We performed 20,000 replicates of cross-validation to determine the number of principal components  
259 with the lowest mean squared error to be retained in the DAPC. After cross-validation, 32 principal  
260 components were retained in the DAPC, and the first and the second discriminant functions (DA1 and  
261 DA2) were used for plotting.

### 262 *Temporal samples for MDT*

263 We reperformed the STRUCTURE analysis and the DAPC with additional samples collected  
264 in 2002–2008 on MDT to make further predictions. For the STRUCTURE analysis, we used the  
265 option “PFROMPOPFLAGONLY” with  $K = 4$ . The DAPC also has an option to predict additional  
266 samples using the function “predict.dapc.” Parameter settings for these analyses are described in the  
267 supplementary methods. The temporal change in the genetic structure on MDT was assessed by  
268 conducting Mantel tests on samples collected in different years using ‘ape’ v. 5.3 (Paradis & Schliep,  
269 2019) based on pairwise  $F_{st}$  and Cavalli-Sforza and Edwards’ genetic distance  $D_c$  (Cavalli-Sforza &  
270 Edwards, 1967) calculated for samples collected in different years using FreeNA.

## 271 **Results**

### 272 *Genetic diversity indices*

273 In total, 565 individuals were genotyped for 15 microsatellite loci; only 0.76% of the dataset was  
274 missing data. After conducting sib-ship assignment analysis, 85 related individuals were removed, and  
275 the dataset included 177 individuals from five mainland and four island populations (the  
276 representatives of MDT were those individuals sampled in 1998). After conducting the Bonferroni  
277 correction for multiple comparisons, there was no evidence of linkage equilibrium. There were no  
278 alleles for which the null allele frequencies were  $>0.2$  across all populations (Table S3). In the mixed  
279 linear model comparisons between the mainland populations and one island population, allelic  
280 richness was significantly lower for all insular populations, although the degree of such a reduction  
281 was lowest for MDT, moderate for KKJ, and highest for CCJ (Figures 2a and 3a). A pattern was  
282 similar for observed heterozygosity, although the observed reduction was not statistically significant  
283 for the MDT and KKJ populations (Figure 3c). Contrastingly, the reduction in expected

284 heterozygosity was significant for the CCJ and KKJ populations but not the MDT population (Figures  
285 2b and 3b).

286 A model including the inbreeding coefficient performed better than a model without this  
287 coefficient only in the Kyushu population based on DIC values (Table 2), whereas the 95% credibility  
288 intervals of inbreeding coefficients included zero for all populations, indicating that inbreeding was  
289 not supported statistically in any population. A population bottleneck was supported statistically for  
290 the CCJ and KDT populations by both the heterozygosity excess and  $M$ -ratio test (Table 2). The  $M$ -  
291 ratio was  $<0.68$  for the KKJ population; given that the  $M$ -ratio is more sensitive for detecting a  
292 genetic bottleneck than testing a heterozygosity excess (Cornuet & Luikart, 1996; Garza &  
293 Williamson, 2001), a genetic bottleneck in the KKJ population was supported to a lesser extent than  
294 that in the CCJ population.

### 295 *Genetic differentiation and spatial genetic structure*

296 The genetic differentiation of insular populations was supported by  $F_{st}$  values, STRUCTURE analysis,  
297 and the DAPC, although the degree of genetic differentiation differed among populations (Figure 2c;  
298 Figure 4a, b). The differentiation of insular populations from the mainland populations was  
299 statistically supported by the  $F_{st}$  values of most pairs. The degree of genetic differentiation of the  
300 island populations relative to the mainland populations was higher for CCJ than for KKJ and MDT ( $p$   
301 = 0.0078 and 0.01 for KKJ and MDT, respectively; 10,000 permutations;  $\alpha = 0.017$  after Bonferroni  
302 correction). The degree of differentiation of each island population also varied depending on which  
303 mainland populations were used for comparison; for instance, a lack of genetic differentiation  
304 between the KKJ and Kyushu populations and low differentiation between the MDT and Kanto  
305 populations were inferred (10,000 two-tailed bootstrap;  $\alpha = 0.005$  after Bonferroni correction; Figure  
306 2c).

307 The apparent genetic differentiation of the CCJ population was supported by STRUCTURE  
308 analysis (with the highest  $\Delta K$  values occurring at  $K = 4$ ; Figure S1) (Figure 4a) and the DAPC (the  
309 first discriminant function with the highest discriminatory power; Figure 4b). At  $K = 4$  in  
310 STRUCTURE analysis, most individuals were assigned to a major genetic cluster in CCJ with  
311 probabilities of  $>80\%$  (cluster A [yellow] in Figure 4a). Although cluster A was rare in all mainland  
312 populations, a few individuals were associated with this genetic cluster with higher probabilities, i.e.,  
313 one from Hokkaido (68.3%) and one from Nagano (65.3%). No individual from Kanto, Osaka, or  
314 Kyushu exceeded a 50% assignment probability to cluster A. The DAPC gave similar results, i.e., the  
315 position of one Hokkaido sample assigned largely to cluster A was inferred with a first discriminant  
316 score as large as that of the CCJ population. Therefore, it is likely that only a small number of shrikes  
317 inhabiting Hokkaido (or a population nearby) colonized CCJ, leading to a strong founder effect and

318 fixation; thus, the CCJ population is genetically differentiated and reflects the rare allelic combination  
319 of the mainland.

320 In 1998, the MDT population exhibited a skewed genetic cluster composition and slight  
321 genetic differentiation according to STRUCTURE analysis (cluster D [green] was the major cluster)  
322 and could also be discriminated via the second discriminant function of the DAPC (Figure 4). Genetic  
323 clusters were shared with many mainland individuals in STRUCTURE analysis, and more individuals  
324 from MDT were located toward the mainland population cluster than those from CCJ and KKJ in the  
325 DAPC plane. Furthermore, STRUCTURE analyses including temporal samples collected between  
326 1998 and 2008 indicated that an increase in cluster C (blue) and decrease in cluster D (green)  
327 occurred between 1998 and 2002 (Figure 5a), corresponding to the shift toward positive DA2 scores  
328 in the DAPC (Figures 5b and S2), indicating a replacement of the major genetic cluster with that from  
329 the mainland. Results of the Mantel test supported a temporal change of genetic structure on MDT  
330 over the eight-year sampling period based on both the  $F_{st}$  ( $R = 0.70$ ,  $p = 0.001$ ) and Cavalli-Sforza  
331 and Edwards' genetic distance ( $R = 0.60$ ,  $p = 0.032$ ) (Figure S3), whereas the pattern was weakened  
332 ( $F_{st}$ :  $R = 0.40$ ,  $p = 0.037$ ) or statistically unsupported (Cavalli-Sforza and Edwards' genetic distance:  
333  $R = 0.15$ ,  $p = 0.25$ ) when the samples from 1998 were excluded (Figure S4). No change in  
334 heterozygosity or allelic richness was observed throughout the study years on MDT (Figure S5).  
335 Together, these results indicate that weak genetic differentiation was once established on MDT but  
336 was obscured between 1998 and 2002 by recurrent immigration and gene flow from the mainland.  
337 Notably, only one individual had cluster A at a relatively high percentage (38.5%; Figure 4a, arrow).  
338 The KDT population was located near the MDT population on the DAPC plane, suggesting that a  
339 metapopulation structure exists between these two islands in the Daito Islands, i.e., that KDT is the  
340 sink population. This interpretation is corroborated by strong support for the bottleneck (Table 2).

341 In the STRUCTURE analysis, the genetic distinctiveness of the KKJ population was  
342 inconclusive. Based on the discriminant functions of the DAPC, there was a slight trend indicating  
343 that eastern, northern, or high-altitudinal populations (Hokkaido, Kanto, and Nagano) were located  
344 toward the fourth quadrant, whereas western populations (Osaka and Kyushu) were located toward  
345 the second quadrant of the plane. Therefore, the genetic differentiation of the KKJ population was less  
346 pronounced than that of the western mainland populations.

## 347 **Discussion**

348 In the present study, population genetics analyses of multiple island populations of the bull-headed  
349 shrike supported different scenarios of colonization for different islands. Analysis results of the CCJ  
350 population were concordant with the founder effect scenario (scenario 1), i.e., a genetic structure  
351 representing a rare genetic cluster on the mainland, strong signatures of a genetic bottleneck, and

352 significantly lower allelic richness and heterozygosity than those of the mainland. Despite the small  
353 sample size of the KKJ population, its allelic richness was significantly lower than that of the  
354 mainland yet higher than that of the CCJ population, and the genetic bottleneck signature was weaker  
355 than that of the CCJ population. The genetic differentiation was slight from most of the mainland  
356 populations and was not even supported from the possible source area (Kyushu), indicating that  
357 scenario 1 was unlikely (Clegg et al., 2002; Estoup and Clegg, 2003). In addition, significantly low  
358 expected heterozygosity i.e., low allele frequency, allowed us to reject the recurrent immigration  
359 scenario (scenario 3). Therefore, the large founder scenario (scenario 2) was most likely for the KKJ  
360 population. The inferred difference in the influence of founder effects on the CCJ and KKJ  
361 populations is unlikely to be an artifact of our sampling scheme because (1) a significant difference in  
362 the initial population sizes of the two islands was found in field censuses (Table 1) and (2) the mean  
363 expected heterozygosity of the KKJ population was similar to that of *Zosterops lateralis* populations  
364 without severe bottlenecks, whereas that of the CCJ population was as low as that of *Zosterops*  
365 populations with strong bottlenecks (Clegg et al., 2002). In contrast, analysis results of the MDT  
366 population in 1998 were concordant with scenario 3, i.e., supported by the lack of a genetic bottleneck,  
367 a heterozygosity as high as that of the mainland populations, relatively high allelic richness, and a low  
368 level of genetic differentiation. Recurrent immigration also possibly occurred between 1998 and 2002,  
369 further obscuring genetic differentiation. These findings support the occurrence of at least two  
370 recurrent immigration events since population founding and before 2008. Overall, our genetic  
371 analyses of multiple new island populations suggest that island populations can be established through  
372 different combinations of the founder effect and recurrent immigration.

373         Although differences between the recurrent immigration and large founder scenarios have  
374 been debated (Clegg et al., 2002; Grant, 2002), they may not be mutually exclusive. The abrupt  
375 change in genetic structure on MDT between 1998 and 2002 suggests that recurrent immigration  
376 occurred in a large flock. This notion is supported by the contrary case of cluster A, which did not  
377 spread to MDT after 1998 while only one breeding female shrike was found with this cluster at 38%  
378 of its genetic contribution in 1998. Moreover, the low but statistically significant genetic  
379 differentiation of the MDT population in 1998 could only be established through a founder effect.  
380 Collectively, these results indicate that the MDT population may have been established by a relatively  
381 large founding population, which did not result in the representation of a rare allele combination but  
382 was sufficient to skew the genetic composition, which was in turn obscured by subsequent multiple  
383 recurrent immigrations. Multiple immigration events highlight the scenario wherein a founder  
384 population does not necessarily consist of one discrete and simultaneous arrival but rather several  
385 arrivals that continue over time. This scenario is supported by a direct observation of colonization by  
386 Galápagos finches (Grant et al., 2001), wherein breeding was initiated after years of continuous visits  
387 by immigrants upon colonization. The case on the Galápagos Islands involved colonization from

388 source populations several tens of kilometers away; however, this scenario may be prevalent even  
389 under geographically remote conditions, like in our case. Thus, a founder population, which usually  
390 assumes temporal discreteness from recurrent immigrants (Mayr, 1954), may be difficult to define  
391 owing to temporal continuity (Grant, 2002). Nevertheless, temporal dynamics in the number of  
392 immigrants may exist, and arrival peaks may be concentrated within a few years, as shown in our  
393 temporal MDT analyses and by Grant et al. (2001). Therefore, despite difficulties in distinguishing  
394 “founder individuals” and “recurrent immigrants” at the individual level, we successfully evaluated  
395 their genetic influence at the temporally concentrated “immigration cluster” level. From this  
396 perspective, the newest island population on KKJ may not have reached the timestep at which it  
397 receives a recurrent immigrant cluster.

398         The absence of recurrent immigration is also thought to have influenced the population  
399 persistence of the CCJ population. In our analysis results for CCJ, strong genetic differentiation  
400 driven by sampling of a few mainland individuals indicated the efficacy of the founder effect in  
401 generating genetic differentiation. However, the reduction of genetic variability in the CCJ population  
402 indicated that extinction was inevitable for this population (Lynch, Conery, & Burger 1995). Although  
403 we did not directly assess the effect of inbreeding depression on population persistence in the present  
404 study, we did identify possible inbreeding-related morphological defects in the CCJ population (D.  
405 Aoki & M. Takagi, in prep.). Moreover, the shrikes on CCJ were highly sensitive to human  
406 disturbance (M. Takagi pers. obs.), which has also been reported on KKJ and MDT (Hamao, Torikai,  
407 Yoshikawa, Yamamoto, & Ijichi, 2021). Therefore, the CCJ population was probably susceptible to  
408 genetic deficiencies and demographic and/or environmental stochasticity (or a combination of these  
409 factors), which has been inferred in cases of species invasion (Lockwood, Conery, & Blackburn,  
410 2005). If recurrent immigration occurred before extinction, it could have resulted in the rescue effect  
411 for the CCJ population, allowing it to persist (Brown & Kodric-Brown, 1977). We suggest that a  
412 population founded once is likely to receive subsequent immigration if it persists until recurrent  
413 immigration occurs (as we have discussed for the MDT population), which is possible because island  
414 colonization is not geographically random due to the directionality of dispersal vectors such as the  
415 wind and sea current (Gillespie et al., 2012).

416         Together, we propose that, even in remote island colonization, the genetic impact of recurrent  
417 immigration is crucial for establishing the early-stage population genetic structure as it obscures and  
418 overcomes the initial founder effect. Previously, the contribution of recurrent immigration has been  
419 overlooked at the initial stage of population establishment because full allopatry was assumed soon  
420 after island colonization in terms of the geographic mode of speciation (Warren et al., 2015), although  
421 its demographic processes were not often considered (Harvey, Singhal, & Rabosky, 2019). Genomic  
422 studies on colonization in the evolutionary past have inferred the importance of postdivergence gene  
423 flow (e.g., Lamichhaney et al., 2015; Sendell-Price et al., 2020), although the timing of gene flow has

424 remained controversial owing to the technical difficulty of determining this timing (Smadja & Butlin,  
425 2011). Studies on recent colonization events involving Galápagos finches (Grant, 2002; Grant et al.,  
426 2001) and song sparrows on Mandarte Island (Keller et al., 2001) have suggested the importance of  
427 recurrent immigration for population persistence, although these populations were geographically  
428 close to the surrounding islands (several to tens of kilometers, i.e., a parapatric situation), so recurrent  
429 immigration was expected under the metapopulation framework (Hanski, 1998). In contrast, our cases  
430 included geographically remote islands (several hundreds of kilometers from the mainland source),  
431 i.e., long-distance dispersal outside the normal dispersal range. Therefore, the genetic comparisons of  
432 multiple populations in the present study provided a new and important insight into the origin of  
433 remote island populations that are allopatric in terms of speciation. Recurrent immigration counteracts  
434 founder effects to allow population persistence (Brown & Kodric-Brown, 1977), which creates the  
435 opportunity for a population to diverge via the following processes. Unlike a large founder population,  
436 immigration not only heightens the genetic variation that allows selection to act (Smadja & Butlin,  
437 2011) but also increases the genetic incompatibilities that enable divergence to proceed (Seehausen,  
438 2013) or triggers hybrid speciation (Lamichhaney et al., 2018). Moreover, if colonization occurred  
439 during a glacial period when a sea barrier was much narrower, the widened sea barrier during the  
440 subsequent interglacial period facilitates the acceleration of speciation (Carine et al., 2004; Weigelt,  
441 Steinbauer, Cabral, & Kreft, 2016). Therefore, recurrent immigration could be a key process even for  
442 the evolution of remote island endemics. A future study should include a detailed reconstruction of  
443 temporal demographic changes and phenotypic and genomic evolution in the presence of gene flow,  
444 which could be achieved via substantial sampling and the application of next-generation sequencing  
445 techniques.

#### 446 *Factors affecting the specificity of colonization demography*

447 Why were different scenarios with different influences of founder effects and recurrent immigration  
448 were supported on different islands? Isolation and island area are the two major determinants of  
449 remote island biodiversity and therefore population dynamics (MacArthur & Wilson, 1967; Valente et  
450 al., 2020). In the present study, the isolation level (the closest distance to the mainland is ~300 km  
451 between KKJ and Kyushu, ~570 km between MDT and Kyushu, and ~900 km between CCJ and  
452 Kanto) and land area (57, 30, and 24 km<sup>2</sup> for KKJ, MDT, and CCJ, respectively) differed markedly.  
453 However, it remains unclear why KKJ, the closest and largest island, was colonized last, whereas the  
454 highly remote MDT was the first island colonized and, surprisingly, subject to multiple recurrent  
455 immigration events. Ecological differences are not likely the cause because pronounced differences do  
456 not exist among the three islands compared with those among the mainland and islands, including the  
457 species richness of the terrestrial breeding avifauna (15 for KKJ [Hamao & Torikai, 2011]; 9 for MDT  
458 [Takehara et al., 1999]; and 6 for CCJ [Kawakami, 2019], excluding the bull-headed shrike) and

459 climate (humid subtropical for KKJ, tropical rainforest for MDT, and tropical monsoon for CCJ).  
460 Indeed, the ecology is similar among the islands, especially in relation to the shrikes, given that their  
461 successful colonization is possibly linked to the expansion of the anthropogenic landscape on these  
462 islands (Chiba, 1990; Matsui & Takagi, 2017).

463 The directionality of storms and prevailing winds can affect the frequency of immigration  
464 (Gillespie et al., 2012), potentially affecting the likelihood of recurrent immigration. Tropical  
465 cyclones (typhoons) usually pass Japan on a track from the southwest toward the northeast during  
466 autumn when seasonal migration and postfledgling dispersal occur (Japan Meteorological Agency,  
467 2020), resulting in north winds in the western part of a cyclone that could potentially carry birds away  
468 from their normal range to southern remote islands. Indeed, an individual bull-headed shrike flying  
469 over the Pacific Ocean was sighted 500 km south of the Japanese mainland at N29° E135° after an  
470 autumn typhoon (Itakura, 1985; Figure 1a). Because the annual occurrence rate of typhoons is high  
471 around MDT, moderate around KKJ, and low around CCJ (Makino, 1986), the high frequency of  
472 immigration onto MDT may reflect the likelihood of winds carrying shrikes to the island.

473 The number of immigrants that affect the efficacy of founder effects may be related to  
474 seasonal migration. Our STRUCTURE analysis results suggested that the genetic cluster (cluster A)  
475 reflecting the rare allelic combination of the CCJ population was found at a relatively high level in  
476 shrikes from Hokkaido and Nagano, i.e., those located at high latitudes or high altitudes where  
477 migratory shrikes are abundant (Brazil, 2009; Endo & Ueda, 2016; Yosef & International Shrike  
478 Working Group, 2020). At low latitudinal or altitudinal regions, including Kanto, Osaka, and Kyushu,  
479 shrikes had small portions of this cluster, which is in accordance with the co-occurrence of resident  
480 and migratory shrikes (Imanishi, 2005; Yosef & International Shrike Working Group, 2020). Bull-  
481 headed shrikes are solo nocturnal migrants (S. Hara pars. obs.; Figure S6). Given the observation of a  
482 shrike on the Pacific Ocean after a typhoon by Itakura (1985), there may be many independent  
483 incidents of such solo migrating individuals being displaced far out into the Pacific Ocean by  
484 typhoons, some of which may reach remote islands and form a small founder population, as was the  
485 case on CCJ. Conversely, immigrants that caused the population establishment on KKJ and the abrupt  
486 change in the genetic structure on MDT are possibly associated with different processes such as  
487 dispersal movements by postfledgling flocks consisting of several dozen juveniles (Kurata, 1967;  
488 Yamagishi, 1981). A rare migratory immigrant likely arrived at MDT, however, as reflected by one  
489 individual with 38% of cluster A (Figure 4a, arrow). The likelihood that an island receives migratory  
490 and nonmigratory immigrants as well as the proportion of such immigrants may be dependent on the  
491 migratory and dispersal routes of birds (Lees & Gilroy, 2014; Paradis et al., 1998). Our shrike study  
492 system has the potential to be used for assessing how seasonal migration contributes to the population  
493 establishment and diversification of birds (Rolland, Jiguet, Jønsson, & Condamine, Morlon, 2014).

494 *Conclusion*

495 Recently established populations of animals founded by natural colonization may reflect the  
496 ecologically realistic genetic structure of the early-stage of population colonization (Clegg et al.,  
497 2002; Grant et al., 2001). In the present study, a rare system was evaluated in which birds colonized  
498 multiple remote islands 200–600 km from their normal breeding areas within only several decades.  
499 Our genetic analyses indicated that three remote islands were colonized with different demographic  
500 backgrounds and allowed us to conclude that recurrent immigration from the mainland is important  
501 for population persistence, even on remote islands. This finding is unexpected because remote island  
502 endemics are often assumed to have evolved through a rare long-distance dispersal event; however,  
503 we argue that studying the influence of gene flow at the initial stage of population divergence is  
504 crucial. To the best of our knowledge, this is the first study in which multiple recent colonization  
505 events were compared genetically at the population level. Moreover, our study bridges the gap  
506 between population genetics and macro-scale island biogeography by providing new insights into the  
507 process of population establishment.



## Tables

**Table 1.** Summary for the details of island colonization and sampling years on the three different islands

|                       | <b>Colonization year<br/>(ref)</b> | <b>Sampling year</b> | <b>No. censused individuals<br/>(ref)</b>                              |
|-----------------------|------------------------------------|----------------------|------------------------------------------------------------------------|
| Chichi-jima (CCJ)     | 1984–1988<br>(Chiba, 1990)         | 1997                 | > 2 in 1987 (Chiba, 1990)                                              |
| Kikai-jima (KKJ)      | 2012<br>(Ijichi et al., 2013)      | 2013, 2015           | 20 in 2012 (Hamao et al., 2018)                                        |
| Minami-Daito<br>(MDT) | 1973–1974<br>(Takagi, 2000)        | 1998, 2002-2008      | > 21 in 1989 (Osawa &<br>Osawa, 1990),<br>> 147 in 1998 (Takagi, 2000) |

**Table 2.** Tests for inbreeding and genetic bottlenecks in mainland and insular bull-headed shrike populations. The sample size ( $N$ ) used for calculation is provided for each population. A population for which a model considering inbreeding performed better than one without it is indicated with “+”. Inbreeding coefficient was calculated under a model with inbreeding. For the statistics for genetic bottlenecks,  $p$ -values calculated by Wilcoxon signed-rank test based on 1,000,000 permutations for heterozygosity (Hz) excess and  $M$ -ratio are given. All the indices were calculated by INEST v. 2.2 (Chybicki and Burczyk, 2009)

|                    | $N$ | Inbreeding Model | Inbreeding Coefficient [95% credibility interval] | $P$ (Hz excess) | $M$ -ratio                |
|--------------------|-----|------------------|---------------------------------------------------|-----------------|---------------------------|
| <b>Mainland</b>    |     |                  |                                                   |                 |                           |
| Hokkaido           | 32  | -                | 0.018 [0, 0.05]                                   | 0.92            | 0.99                      |
| Kanto              | 18  | -                | 0.031 [0, 0.08]                                   | 0.99            | 0.99                      |
| Nagano             | 21  | -                | 0.031 [0, 0.09]                                   | 0.78            | 0.86                      |
| Osaka              | 42  | -                | 0.029 [0, 0.07]                                   | 0.96            | 1.0                       |
| Kyushu             | 14  | +                | 0.063 [0, 0.12]                                   | 0.90            | 0.86                      |
| <b>Island</b>      |     |                  |                                                   |                 |                           |
| Chichi-jima (CCJ)  | 15  | -                | 0.026 [0, 0.08]                                   | <b>0.014*</b>   | <b>0.003</b> <sup>□</sup> |
| Kikai-jima (KKJ)   | 5   | -                | 0.027 [0, 0.1]                                    | 0.13            | <b>0.48</b> <sup>□</sup>  |
| Minami-Daito (MDT) | 23  | -                | 0.023 [0, 0.07]                                   | 0.73            | 0.81                      |
| Kita-Daito (KDT)   | 4   | -                | 0.025 [0, 0.1]                                    | <b>0.014*</b>   | <b>0.43</b> <sup>□</sup>  |

\*  $p < 0.05$ , <sup>□</sup>  $M$ -ratio  $< 0.68$

## Figures

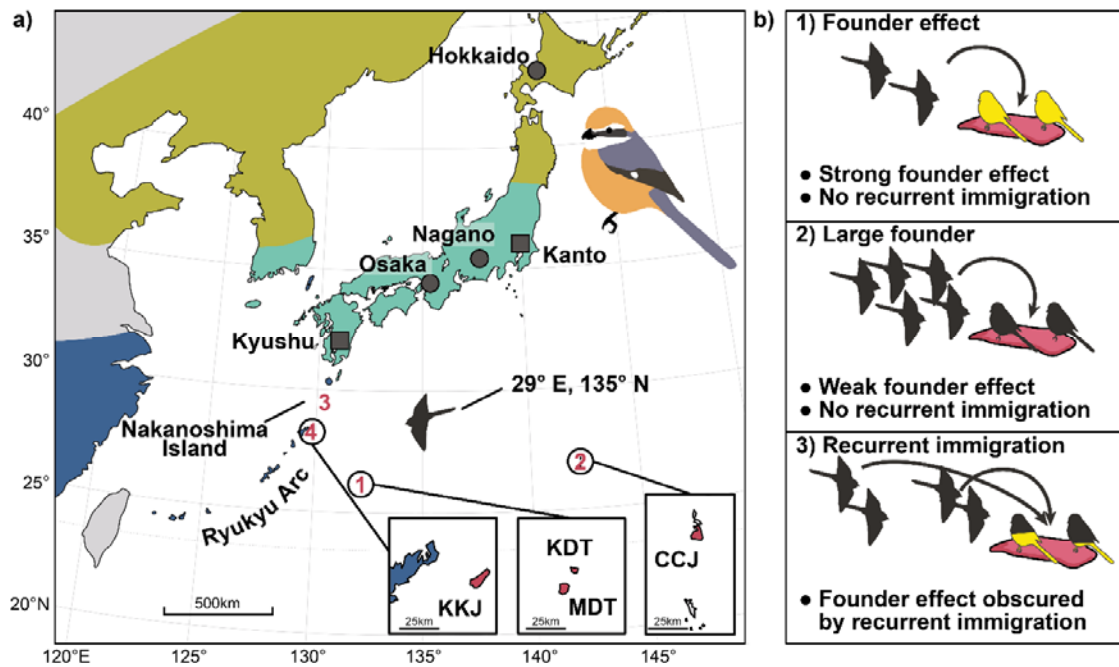

**Figure 1.** (a) The range of the bull-headed shrike and the location of sampling sites for this study. Land colours correspond to different origins of the populations: summer migrants (yellow), both residents and migrants (green), winter visitors or rare seasonal migrants (blue), and residents due to recent colonisation (red, the numbers correspond to the colonisation sequence). Sampling sites are denoted by circles (intensive local sampling) and squares (opportunistic sampling). (b) The three different scenarios with different contributions by the founder effect and recurrent immigration are shown. Abbreviations for island populations are as follows: Chichi-jima = CCJ, Kikai-jima = KKJ, Minami-Daito = MDT, and Kita-Daito = KDT.

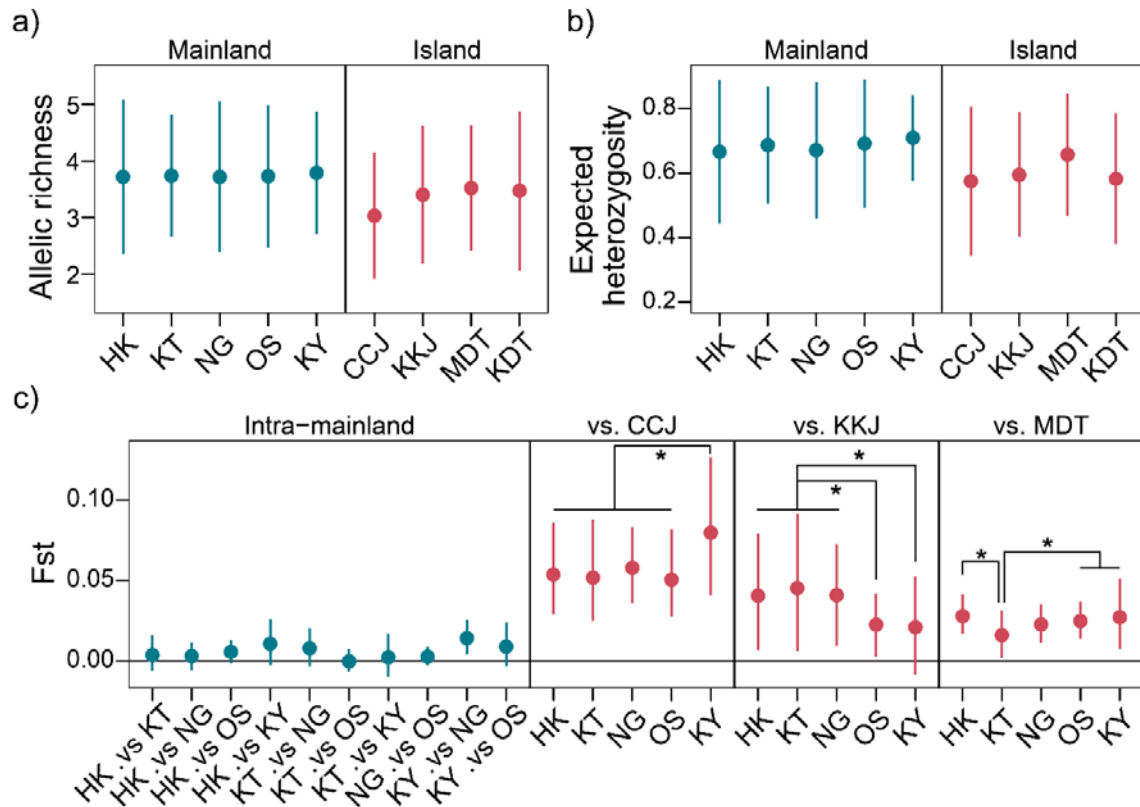

**Figure 2.** Comparisons of genetic diversity indices across five mainland and four insular populations, including (a) allelic richness corrected by rarefaction, (b) expected heterozygosity, and (c) pairwise Fst. Mean values with 95% confidence intervals across 15 loci were indicated. Results of permutation tests were indicated for pairwise Fst within each category of island-mainland comparisons (comparisons with  $p < 0.005$  were indicated with asterisks). Abbreviations for populations are as follows: Hokkaido = HK, Kanto = KT, Nagano = NG, Osaka = OS, Kyushu = KY, and others refer to Figure 1.

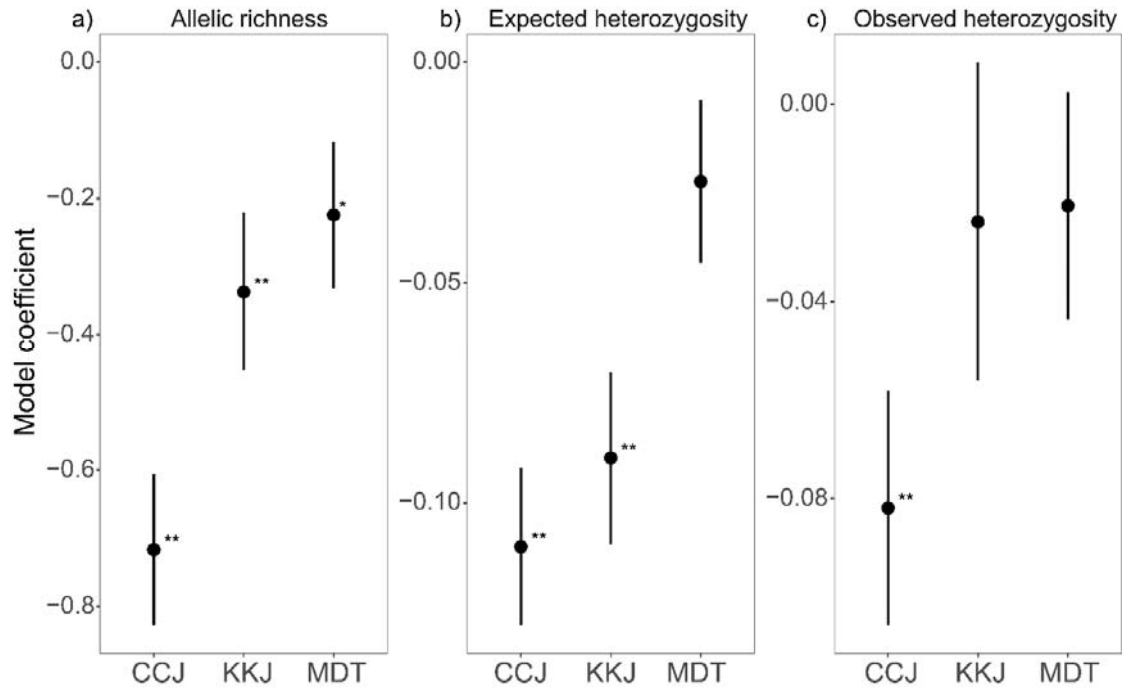

**Figure 3.** Estimated model coefficients of the effects of island on the three different genetic diversity indices from the linear mixed models constructed for each island populations. Coefficients indicate the level of reduction in the indices when compared to the mainland populations, and asterisks denote their statistical significance (\*  $0.01 \leq p < 0.05$ , \*\*  $p < 0.01$ ).

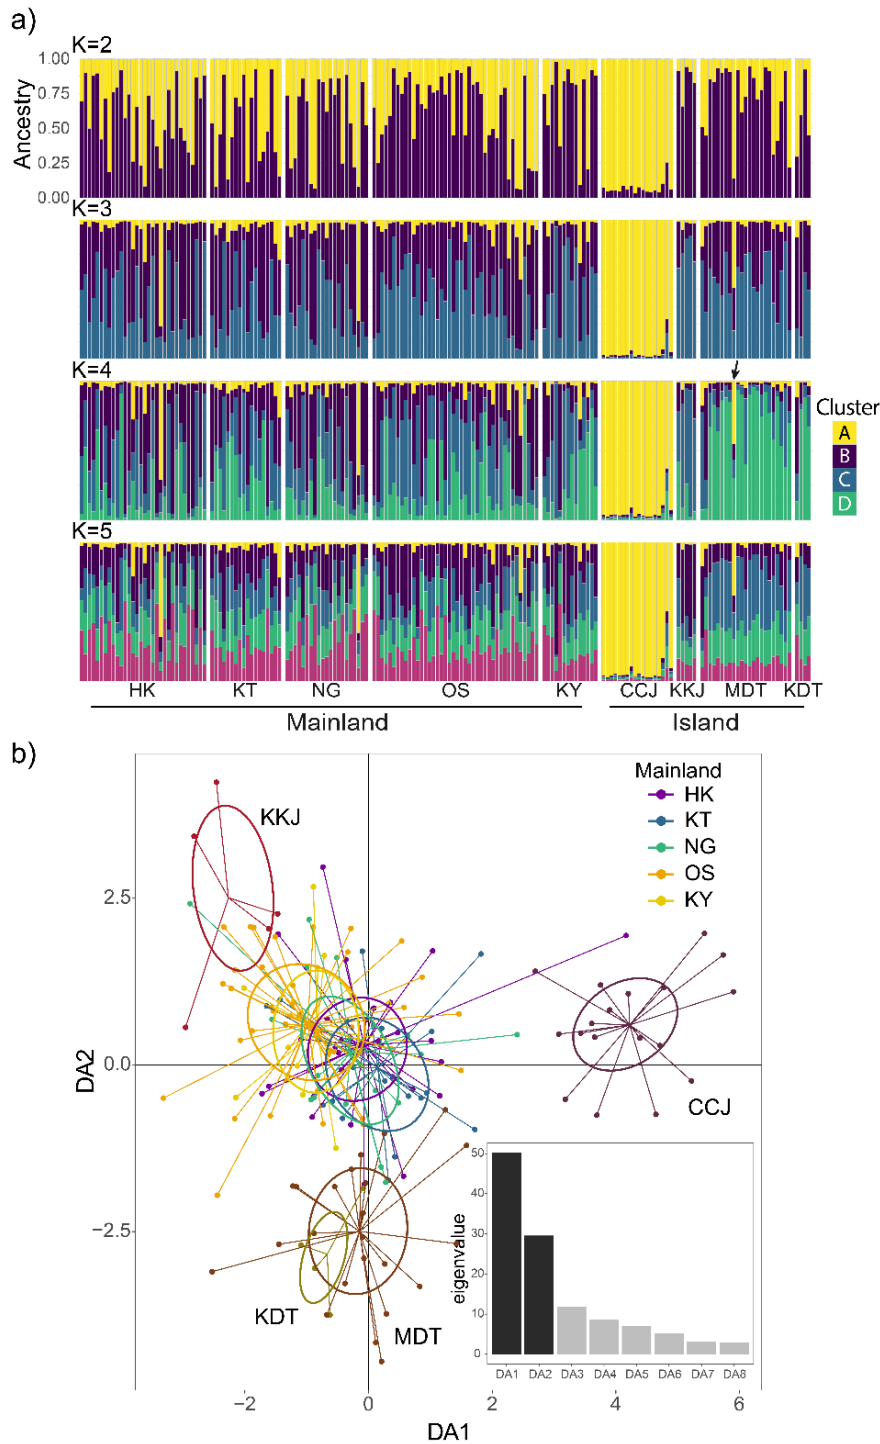

**Figure 4.** Results of genetic clustering for the mainland and insular individuals, inferred by the (a) STRUCTURE and (b) discriminant analysis of principal components (DAPC). (a) Genetic assignment of individuals to each number of genetic cluster  $K$ , ranging from  $K = 2$  to 5, is shown (the highest  $\Delta K$  occurred at  $K = 4$ ). Each bar indicates an individual, and the height of different colours shows the assignment probabilities to each corresponding genetic cluster. (b) A scatterplot shows the first two discriminant functions of the DAPC. Different colours of dots and inertia ellipses represent different sampled populations. In an inset, eigenvalues are shown for each discriminant function.

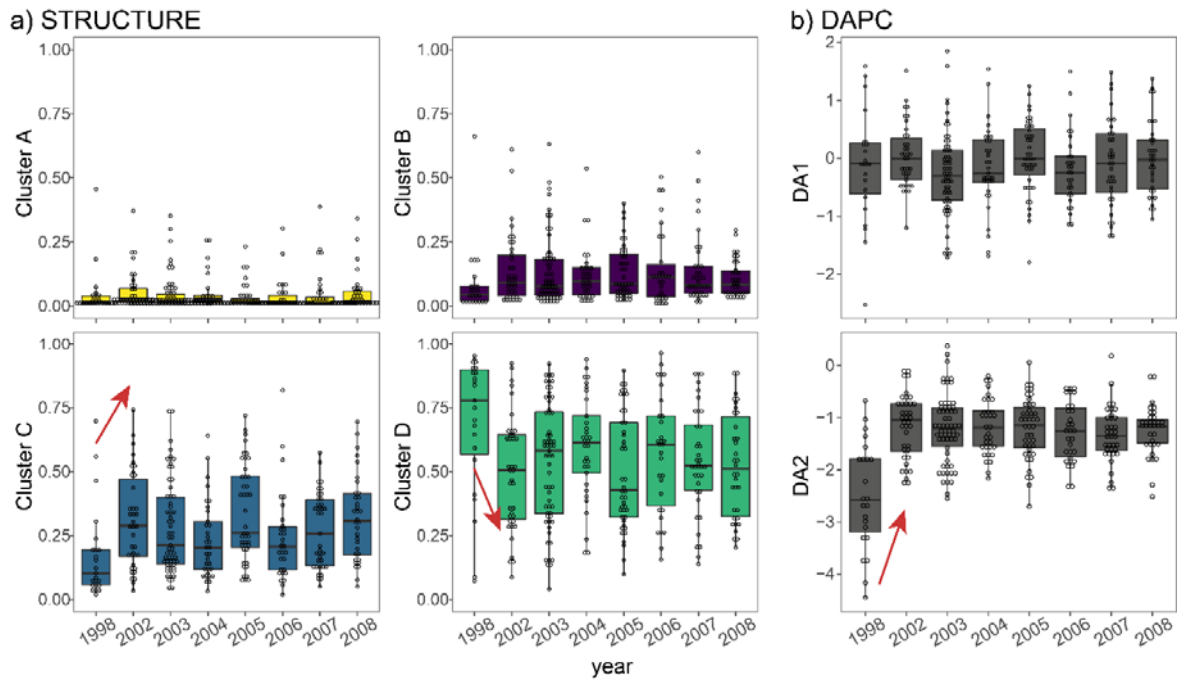

**Figure 5.** Temporal changes in the genetic compositions of the Minami-Daito (MDT) island population. The y-axes represent either (a) the percentages of each genetic cluster in the STRUCTURE analysis and (b) the positions at each discriminant functions in the DAPC. Each dot represents individuals collected in the corresponding years, and their population-level median and interquartile ranges are indicated. Note a temporal change between 1998 and 2002 (indicated by red arrows).

## Data availability statement

Scripts and data for analysis are available on Dryad: [https://datadryad.org/stash/share/XtfJyiIF5kFxf7cOi6fJ12XuEct8i1mMHMpJA\\_9mBg](https://datadryad.org/stash/share/XtfJyiIF5kFxf7cOi6fJ12XuEct8i1mMHMpJA_9mBg). Processed genetic data (product lengths of the microsatellite alleles in the genetic dataset converted from the raw data from fragment analysis) was submitted to the data repository. Settings and procedures for these processes are fully described on the main and supplementary texts.

## References

- Amami Ornithologists' Club. (1997). *Birds in Amami*. Amami Ornithologists' Club.
- Ando, H., Emura, N., Deguchi, T. (2020) First records of Rufous Hawk-Cuckoo *Hierococcyx hyperythrus* in the Ogasawara Islands. *Japanese Journal of Ornithology*, 69(1), 105-108. <https://doi.org/10.3838/jjo.69.105>
- Barton, N. H., Charlesworth, B. (1984). Genetic revolutions, founder effects, and speciation. *Annual Reviews of Ecology and Systematics*, 15, 133-164.
- Brazil, M. (2009). *Birds of East Asia: China, Taiwan, Korea, Japan, and Russia*. A&C Black Publishers.
- Brown, J. H., & Kodric-Brown, A. (1977). Turnover rates in insular biogeography: Effect of immigration on extinction. *Ecology*, 58(2), 445–449. <https://doi.org/10.2307/1935620>
- Carine, M. A., Russell, S. J., Santos-Guerra, A., & Francisco-Ortega, J. (2004). Relationships of the Macaronesian and Mediterranean floras: Molecular evidence for multiple colonizations into Macaronesia and back-colonization of the continent in *Convolvulus* (Convolvulaceae). *American Journal of Botany*, 91(7), 1070–1085. <https://doi.org/10.3732/ajb.91.7.1070>
- Cavalli-Sforza, L. L., & Edwards, A. W. F. (1967). Phylogenetic analysis models and estimation procedures. *American Journal of Human Genetics*, 19(3), 25.
- Chapuis, M.-P., & Estoup, A. (2007). Microsatellite null alleles and estimation of population differentiation. *Molecular Biology and Evolution*, 24(3), 621–631. <https://doi.org/10.1093/molbev/msl191>
- Chiba, H. (1990). First breeding record of the Bull-headed Shrike from the Ogasawara Islands. *Japanese Journal of Ornithology*, 38(3), 150–151. <https://doi.org/10.3838/jjo.38.150>
- Chybicki, I. J., & Burczyk, J. (2009). Simultaneous estimation of null alleles and inbreeding coefficients. *Journal of Heredity*, 100(1), 106–113. <https://doi.org/10.1093/jhered/esn088>
- Clegg, S. M., Degnan, S. M., Kikkawa, J., Moritz, C., Estoup, A., & Owens, I. P. F. (2002). Genetic consequences of sequential founder events by an island-colonizing bird. *Proceedings of the*



- National Academy of Sciences*, 99(12), 8127–8132. <https://doi.org/10.1073/pnas.102583399>
- Cornuet, J. M., & Luikart, G. (1996). Description and power analysis of two tests for detecting recent population bottlenecks from allele frequency data. *Genetics*, 144(4), 2001–2014. <https://doi.org/10.1093/genetics/144.4.2001>
- Devlin, B., & Roeder, K. (1999). Genomic control for association studies. *Biometrics*, 55(4), 997–1004.
- Endo, S., & Ueda, K. (2016). Factors affecting female incubation behavior in the Bull-Headed Shrike. *Ornithological Science*, 15(2), 151–161. <https://doi.org/10.2326/osj.15.151>
- Estoup, A., & Clegg, S. M. (2003). Bayesian inferences on the recent island colonization history by the bird *Zosterops lateralis lateralis*. *Molecular Ecology*, 12(3), 657–674. <https://doi.org/10.1046/j.1365-294X.2003.01761.x>
- Evanno, G., Regnaut, S., & Goudet, J. (2005). Detecting the number of clusters of individuals using the software structure: A simulation study. *Molecular Ecology*, 14(8), 2611–2620. <https://doi.org/10.1111/j.1365-294X.2005.02553.x>
- Falush, D., Stephens, M., & Pritchard, J. K. (2003). Inference of population structure using multilocus genotype data: Linked loci and correlated allele frequencies. *Genetics*, 164(4), 1567–1587. <https://doi.org/10.1093/genetics/164.4.1567>
- Feder, J. L., Flaxman, S. M., Egan, S. P., Comeault, A. A., & Nosil, P. (2013). Geographic mode of speciation and genomic divergence. *Annual Review of Ecology, Evolution, and Systematics*, 44(1), 73–97. <https://doi.org/10.1146/annurev-ecolsys-110512-135825>
- Garza, J. C., & Williamson, E. G. (2001). Detection of reduction in population size using data from microsatellite loci. *Molecular Ecology*, 10(2), 305–318. <https://doi.org/10.1046/j.1365-294X.2001.01190.x>
- Gillespie, R. G., Baldwin, B. G., Waters, J. M., Fraser, C. I., Nikula, R., & Roderick, G. K. (2012). Long-distance dispersal: A framework for hypothesis testing. *Trends in Ecology & Evolution*, 27(1), 47–56. <https://doi.org/10.1016/j.tree.2011.08.009>
- Grant, P. R. (2002). Founder effects and silvereyes. *Proceedings of the National Academy of Sciences*, 99(12), 7818–7820. <https://doi.org/10.1073/pnas.132260299>
- Grant, P. R., Grant, B. R., & Petren, K. (2001). A population founded by a single pair of individuals: Establishment, expansion, and evolution. *Genetica*, 112, 359–382. <https://doi.org/10.1023/A:1013363032724>
- Hamao S., & Torikai H. (2011). The avifauna of Kikai-jima Island of the Amami Islands. *Bulletin of*

*the Kagoshima Prefectural Museum*, 30, 59–64.

- Hamao, S., Torikai, H., Yoshikawa, M., Yamamoto, Y., & Ijichi, T. (2021). Risk-taking behavior of bull-headed shrikes that recently colonized islands. *Current Zoology*, 67(2), 177–182. <https://doi.org/10.1093/cz/zoaa036>
- Hamao S., Yamamoto Y., Torikai H., Ijichi T., & Yoshikawa M. (2018). Breeding ecology of naturally colonizing Bull-headed Shrikes on Kikaijima Island. *Strix: Journal of Field Ornithology*, 34, 69–80.
- Hanski, I. (1998). Metapopulation dynamics. *Nature*, 396(6706), 41–49. <https://doi.org/10.1038/23876>
- Harvey M. G., Singhal, S., Rabosky, D. L. (2019). Beyond reproductive isolation: demographic controls on the speciation process. *Annual Reviews in Ecology, Evolution, and Systematics*, 50, 75-95.
- Hemstrom, W. B., Freedman, M. G., Zalucki, M. P., Ramírez, S. R., & Miller, M. R. (2022). Population genetics of a recent range expansion and subsequent loss of migration in monarch butterflies. *Molecular Ecology*, 31(17), 4544–4557. <https://doi.org/10.1111/mec.16592>
- Hey, J. (2010). Isolation with migration models for more than two populations. *Molecular Biology and Evolution*, 27(4), 905-920.
- Ijichi T., Torikai H., & Hamao S. (2013). A breeding record of the Bull-headed Shrike on Kikai-jima Island in the Amami Islands group. *Japanese Journal of Ornithology*, 62(1), 68–71. <https://doi.org/10.3838/jjo.62.68>
- Imanishi, S. (2005). From where to where do Bull-headed shrikes migrate? *BIRDER*, 19(11), 30–31.
- Itakura H. (1985). Records of the insects and the birds visited a weather-ship located at the Ocean Weather Station “Tango” on the Pacific, II. *The ship and maritime meteorology*, 29, 16–19.
- Jakobsson, M., & Rosenberg, N. A. (2007). CLUMPP: A cluster matching and permutation program for dealing with label switching and multimodality in analysis of population structure. *Bioinformatics*, 23(14), 1801–1806. <https://doi.org/10.1093/bioinformatics/btm233>
- Japan Meteorological Agency. (2020). *Information on Typhoon*. <https://www.jma.go.jp/jma/kishou/known/typhoon/index.html>
- Jombart, T. (2008). adegenet: A R package for the multivariate analysis of genetic markers. *Bioinformatics*, 24(11), 1403–1405. <https://doi.org/10.1093/bioinformatics/btn129>
- Jombart, T., Devillard, S., & Balloux, F. (2010). Discriminant analysis of principal components: A new method for the analysis of genetically structured populations. *BMC Genetics*, 11(1), 94.

<https://doi.org/10.1186/1471-2156-11-94>

- Jones, O. R., & Wang, J. (2010). COLONY: A program for parentage and sibship inference from multilocus genotype data. *Molecular Ecology Resources*, 10(3), 551–555. <https://doi.org/10.1111/j.1755-0998.2009.02787.x>
- Kalinowski, S. T. (2004). Counting alleles with rarefaction: private alleles and hierarchical sampling designs. *Conservation Genetics*, 5(4), 539–543. <https://doi.org/10.1023/B:COGE.0000041021.91777.1a>
- Kalinowski, S. T. (2005). hp-rare 1.0: A computer program for performing rarefaction on measures of allelic richness. *Molecular Ecology Notes*, 5(1), 187–189. <https://doi.org/10.1111/j.1471-8286.2004.00845.x>
- Kawakami K. (2019). The history of anthropogenic disturbance and invasive alien species impact on the indigenous avifauna of the Ogasawara Islands, southern Japan. *Japanese Journal of Ornithology*, 68(2), 237–262. <https://doi.org/10.3838/jjo.68.237>
- Keller, L. F., Jeffery, K. J., Arcese, P., Beaumont, M. A., Hochachka, W. M., Smith, J. N. M., & Bruford, M. W. (2001). Immigration and the ephemerality of a natural population bottleneck: Evidence from molecular markers. *Proceedings of the Royal Society of London. Series B: Biological Sciences*, 268(1474), 1387–1394. <https://doi.org/10.1098/rspb.2001.1607>
- Kurata, A. (1967). The social structure of Bull-headed Shrike with special reference to the territoriality of its breeding season. *Tori*, 18, 153–164.
- Kuznetsova, A., Brockhoff, P. B., & Christensen, R. H. B. (2017). lmerTest package: tests in linear mixed effects models. *Journal of Statistical Software*, 82(13). <https://doi.org/10.18637/jss.v082.i13>
- Lamichhaney, S., Berglund, J., Almén, M. S., Maqbool, K., Grabherr, M., Martinez-Barrio, A., Promerová, M., Rubin, C.-J., Wang, C., Zamani, N., Grant, B. R., Grant, P. R., Webster, M. T., & Andersson, L. (2015). Evolution of Darwin's finches and their beaks revealed by genome sequencing. *Nature*, 518(7539), 371–375. <https://doi.org/10.1038/nature14181>
- Lamichhaney, S., Han, F., Webster, M. T., Andersson, L., Grant, B. R., & Grant, P. R. (2018). Rapid hybrid speciation in Darwin's finches. *Science*, 359(6372), 224–228. <https://doi.org/10.1126/science.aao4593>
- Lees, A. C., & Gilroy, J. J. (2014). Vagrancy fails to predict colonization of oceanic islands. *Global Ecology and Biogeography*, 23(4), 405–413. <https://doi.org/10.1111/geb.12129>
- Lockwood, J. L., Cassey, P., & Blackburn, T. (2005). The role of propagule pressure in explaining species invasions. *Trends in Ecology & Evolution*, 20(5), 223–228.

<https://doi.org/10.1016/j.tree.2005.02.004>

- Lynch, M., Conery, J., & Burger, R. (1995). Mutation accumulation and the extinction of small populations. *The American Naturalist*, 146(4), 489–518.
- MacArthur, R. H., & Wilson, E. O. (1967). *The Theory Of Island Biogeography*. Princeton university press.
- Makino M. (1986). Extreme value distribution of wind speed caused by typhoons in the Ryukyu and the Bonin islands. *Wind Engineers, JAWE*, 1986(30), 33-40. [https://doi.org/10.5359/jawe.1986.30\\_33](https://doi.org/10.5359/jawe.1986.30_33)
- Matsui, S., & Takagi, M. (2017). Habitat selection by the Bull-headed Shrike *Lanius bucephalus* on the Daito Islands at the southwestern limit of its breeding range. *Ornithological Science*, 16(1), 79–86. <https://doi.org/10.2326/osj.16.79>
- Matsuo, A., Tomimatsu, H., Suzuki, J.-I., Saitoh, T., Shibata, S., Makita, A., & Suyama, Y. (2014). Female and male fitness consequences of clonal growth in a dwarf bamboo population with a high degree of clonal intermingling. *Annals of Botany*, 114(5), 1035–1041. <https://doi.org/10.1093/aob/mcu176>
- Mayr, E. (1954). Change of genetic environment and evolution. In J. Huxley, A. C. Hardy, & E. B. Ford (Eds.), *Evolution as a Process*. George Allen & Unwin.
- Ministry of the Environment of Japan. (2020). *Web-GIS Atlast of Birds (Bird Banding Survey, Data of Recovery Records)*. [http://www.biodic.go.jp/birdRinging\\_en/index.html](http://www.biodic.go.jp/birdRinging_en/index.html).
- Morioka H. (1990). Breeding birds of the Tokara Islands and their origin. *Memoirs of the National Science Museum*, 23, 151–166.
- Nei, M., Maruyama, T., & Chakraborty, R. (1975). The bottleneck effect and genetic variability in populations. *Evolution*, 29(1), 1–10. <https://doi.org/10.1111/j.1558-5646.1975.tb00807.x>
- Okinawa Wild Bird Study Group. (1986). *Wild Birds of Okinawa*. Okinawa Wild Bird Study Group.
- Osawa K., & Osawa Y. (1990). Birds on Minami-Daito (South Borodino) Island. *Journal of the Yamashina Institute for Ornithology*, 22(2), 133–137. <https://doi.org/10.3312/jyio1952.22.133>
- Paradis, E., Baillie, S. R., Sutherland, W. J., & Gregory, R. D. (1998). Patterns of natal and breeding dispersal in birds. *Journal of Animal Ecology*, 67(4), 518–536. <https://doi.org/10.1046/j.1365-2656.1998.00215.x>
- Paradis, E., & Schliep, K. (2019). ape 5.0: An environment for modern phylogenetics and evolutionary analyses in R. *Bioinformatics*, 35(3), 526–528. <https://doi.org/10.1093/bioinformatics/bty633>

- Patiño, J., Whittaker, R. J., Borges, P. A. V., Fernández-Palacios, J. M., Ah-Peng, C., Araújo, M. B., Ávila, S. P., Cardoso, P., Cornuault, J., de Boer, E. J., de Nascimento, L., Gil, A., González-Castro, A., Gruner, D. S., Heleno, R., Hortal, J., Illera, J. C., Kaiser-Bunbury, C. N., Matthews, T. J., ... Emerson, B. C. (2017). A roadmap for island biology: 50 fundamental questions after 50 years of *The Theory of Island Biogeography*. *Journal of Biogeography*, *44*(5), 963–983. <https://doi.org/10.1111/jbi.12986>
- Pritchard, J. K., Stephens, M., & Donnelly, P. (2000). Inference of population structure using multilocus genotype data. *Genetics*, *155*(2), 945–959. <https://doi.org/10.1093/genetics/155.2.945>
- Pruett, C. L., & Winker, K. (2005). Northwestern song sparrow populations show genetic effects of sequential colonization. *Molecular Ecology*, *14*(5), 1421–1434. <https://doi.org/10.1111/j.1365-294X.2005.02493.x>
- Raymond, M., & Rousset, F. (1995). GENEPOP (Version 1.2): population genetics software for exact tests and ecumenicism. *Journal of Heredity*, *86*(3), 248–249. <https://doi.org/10.1093/oxfordjournals.jhered.a111573>
- Rolland, J., Jiguet, F., Jønsson, K. A., Condamine, F. L., & Morlon, H. (2014). Settling down of seasonal migrants promotes bird diversification. *Proceedings of the Royal Society B: Biological Sciences*, *281*(1784), 20140473. <https://doi.org/10.1098/rspb.2014.0473>
- Rousset, F. (2008). genepop'007: A complete re-implementation of the genepop software for Windows and Linux. *Molecular Ecology Resources*, *8*(1), 103–106. <https://doi.org/10.1111/j.1471-8286.2007.01931.x>
- Seehausen, O. (2013). Conditions when hybridization might predispose populations for adaptive radiation. *Journal of Evolutionary Biology*, *26*(2), 279–281. <https://doi.org/10.1111/jeb.12026>
- Sendell-Price, A. T., Ruegg, K. C., Anderson, E. C., Quilodrán, C. S., Doren, B. M. V., Underwood, V. L., Coulson, T., & Clegg, S. M. (2020). The genomic landscape of divergence across the speciation continuum in island-colonising silvereyes. *G3 Genes/Genomes/Genetics*, *10*(3147–3163), 17. <https://doi.org/10.1534/g3.120.401352>
- Sendell-Price, A. T., Ruegg, K. C., Robertson, B. C., & Clegg, S. M. (2021). An island-hopping bird reveals how founder events shape genome-wide divergence. *Molecular Ecology*, *30*(11), 2495–2510. <https://doi.org/10.1111/mec.15898>
- Slatkin, M. (2004). A population-genetic test of founder effects and implications for Ashkenazi Jewish diseases. *American Journal of Human Genetics*, *75*(2), 282–293.
- Smadja, C. M., & Butlin, R. K. (2011). A framework for comparing processes of speciation in the

- presence of gene flow. *Molecular Ecology*, 20(24), 5123–5140.  
<https://doi.org/10.1111/j.1365-294X.2011.05350.x>
- Takagi M. (2000). Plumage, morphology, distribution and breeding ecology of the Bull-headed Shrike on Minami-daito Island. *Journal of Yamashina Institute for Ornithology*, 32(1), 13–23.  
<https://doi.org/10.3312/jyio1952.32.13>
- Takehara, K., Anezaki, S., Takagi, M., Okuda, H., & Kanagawa, M. (1999). New records of the birds in Minami Daito-jima Island, the Nansei-Shoto. *Bulletin of Okinawa Prefectural Museum*, 25, 75–93.
- Valente, L. M., Phillimore, A. B., Melo, M., Warren, B. H., Clegg, S. M., Havenstein, K., Tiedemann, R., Illera, J. C., Thébaud, C., Aschenbach, T., & Etienne, R. S. (2020). A simple dynamic model explains the diversity of island birds worldwide. *Nature*, 579(7797), 92–96.  
<https://doi.org/10.1038/s41586-020-2022-5>
- Vincek, V., O’Huigin, C., Satta, Y., Takahata, N., Boag, P. T., Grant, P. R., Grant, B. R., & Klein, J. (1997). How large was the founding population of Darwin’s finches? *Proceedings of the Royal Society of London. Series B: Biological Sciences*, 264(1378), 111–118.  
<https://doi.org/10.1098/rspb.1997.0017>
- Warren, B. H., Simberloff, D., Ricklefs, R. E., Aguilée, R., Condamine, F. L., Gravel, D., Morlon, H., Mouquet, N., Rosindell, J., Casquet, J., Conti, E., Cornuault, J., Fernández-Palacios, J. M., Hengl, T., Norder, S. J., Rijdsdijk, K. F., Sanmartín, I., Strasberg, D., Triantis, K. A., ... Thébaud, C. (2015). Islands as model systems in ecology and evolution: Prospects fifty years after MacArthur-Wilson. *Ecology Letters*, 18(2), 200–217. <https://doi.org/10.1111/ele.12398>
- Weigelt, P., Steinbauer, M. J., Cabral, J. S., & Kreft, H. (2016). Late Quaternary climate change shapes island biodiversity. *Nature*, 532(7597), 99–102. <https://doi.org/10.1038/nature17443>
- Whittaker, R. J., & Fernández-Palacios, J. M. (2007). *Island Biogeography: Ecology, Evolution, and Conservation*. Oxford University Press.
- Wilson, G. A., & Rannala, B. (2003). Bayesian inference of recent migration rates using multilocus genotypes. *Genetics*, 163(3), 1177–1191.
- Yamagishi S. (1981). *Mozu no Yomeiri*. Dainippon Tosho.
- Yosef, R., & International Shrike Working Group. (2020). Bull-headed Shrike (*Lanius bucephalus*), version 1.0. In J. del Hoyo, E. J. Sargatal, D. A. Christie, & E. Juana (Eds.), *Birds of the World*. Cornell Lab of Ornithology.

## **Biosketch**

Daisuke Aoki is an evolutionary ecologist, who is specialized in the fields of phylogeography, population genetics and avian migration. His research aim is to bridge a gap between microevolution and macroevolution by asking how biogeographic histories of organisms interacted with natural selection, stochastic processes, and evolutionary constraints. He achieves this aim through multifaceted approaches, including genetics and genomics, spatial modelling, mathematical simulation, and field biologgging approaches.

DA, SM and MT conceived the ideas and designed the study; DA, SM, MT, and IN led the fieldwork; DA led the laboratory procedures with supports by ME, JN, and IN; DA analysed the data, coordinated the study, prepared the draft, led the writing and revised the manuscript with assistance from MT and SM. All authors gave final approval for publication and agree to be held accountable for the work performed therein.
